# Supplementary material for: A non-covalent complex of quantum dots and chlorin e6: efficient energy transfer and remarkable stability in living cells revealed by FLIM
Source: Royal Society of Chemistry journal article supplement (doi:10.1039/c4ra09998b), 2014-01-01
Supplement: c4ra09998b1.pdf [file c4ra09998b1.pdf]

Supplementary Information

## Non-covalent complex of quantum dots and chlorin $e_6$ : efficient energy transfer and remarkable stability in living cells revealed by FLIM

Jurga Valanciunaite, Andrey S. Klymchenko, Artiom Skripka, Ludovic Richert, Simona Steponkiene, Giedre Streckyte, Yves Mely and Ricardas Rotomskis

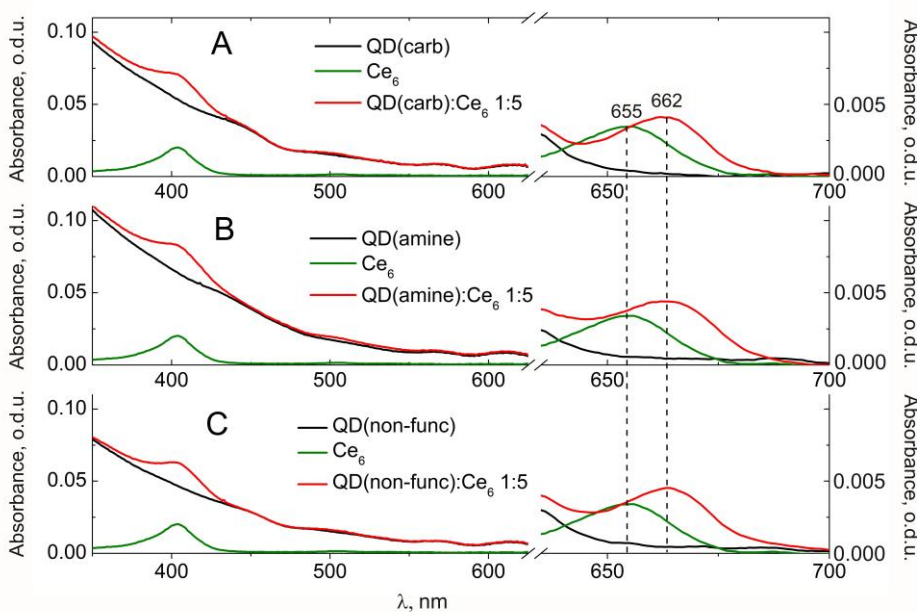

**Figure S1.** Absorption spectra of 0.02  $\mu\text{M}$  carboxyl (A), amine (B) and non-functionalized (C) QD, 0.1  $\mu\text{M}$   $\text{Ce}_6$  and corresponding mixed QD- $\text{Ce}_6$  (0.02  $\mu\text{M}$  QD : 0.1  $\mu\text{M}$   $\text{Ce}_6$ ) solutions (buffer pH 7).

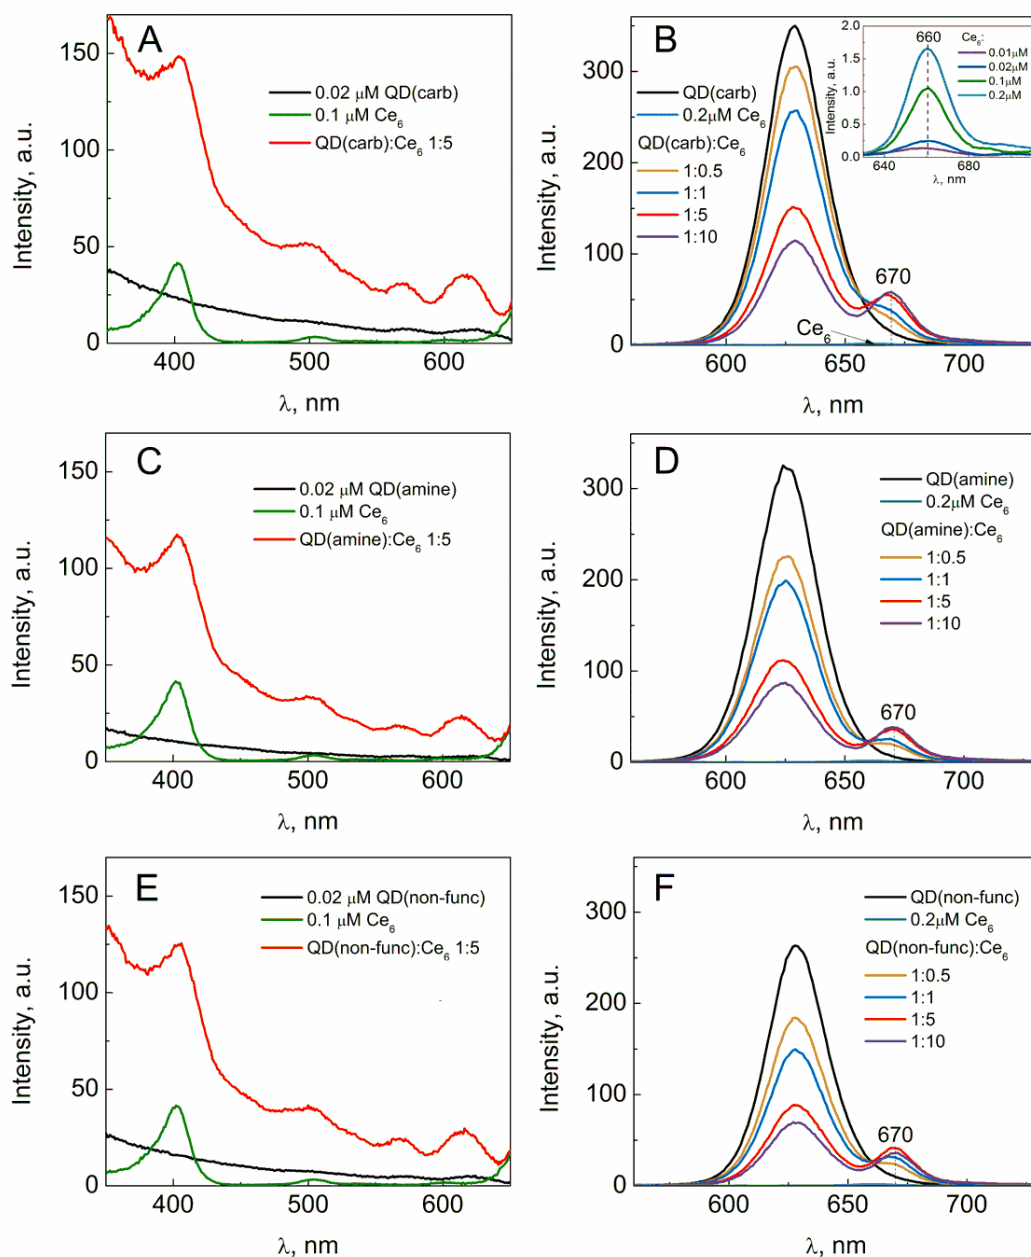

**Figure S2.** Fluorescence excitation spectra of free 0.02  $\mu\text{M}$  carboxyl (A), amine (C) and non-functionalized (E) QDs, 0.1  $\mu\text{M}$   $\text{Ce}_6$  and corresponding mixed QD- $\text{Ce}_6$  (0.02  $\mu\text{M}$  QD : 0.1  $\mu\text{M}$   $\text{Ce}_6$ ) solutions at  $\lambda_{\text{em}} = 670$  nm. B, D, F - Fluorescence spectra of respective QD,  $\text{Ce}_6$  and QD- $\text{Ce}_6$  solutions at varying QD: $\text{Ce}_6$  molar ratio from 1:0.1 to 1:10 at  $\lambda_{\text{ex}} = 465$  nm. The inset in Figure B shows the fluorescence of  $\text{Ce}_6$  solution at corresponding concentrations at  $\lambda_{\text{ex}} = 465$  nm.

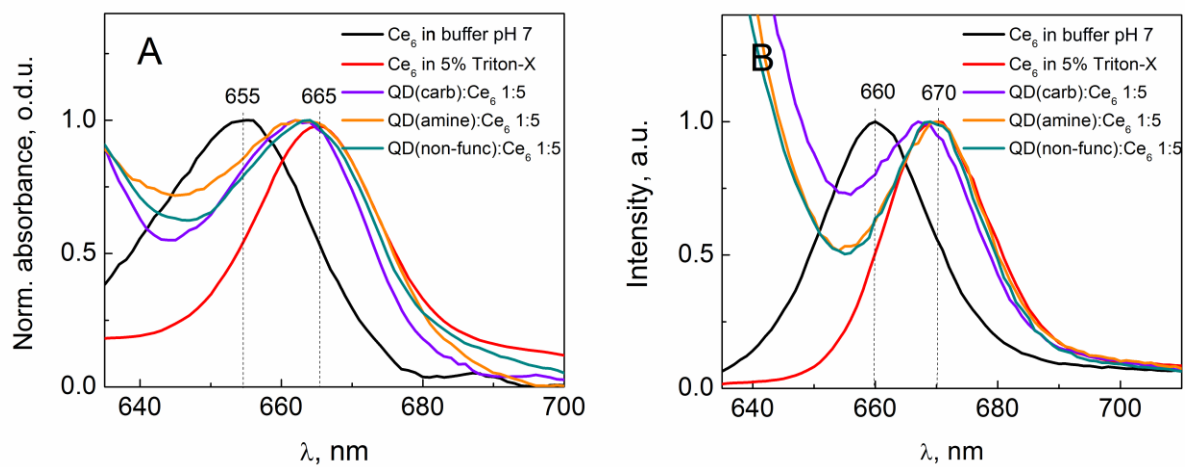

**Figure S3.** Normalized absorption (A) and fluorescence (B) spectra of  $0.1 \mu\text{M}$   $\text{Ce}_6$  in buffer, 5% Triton-X 100 and in the presence of  $0.02 \mu\text{M}$  QD with different terminal groups (QD: $\text{Ce}_6$  1:5). The excitation at 400 nm was used for  $\text{Ce}_6$  in buffer and Triton-X and at 465 nm for QD- $\text{Ce}_6$  solutions.

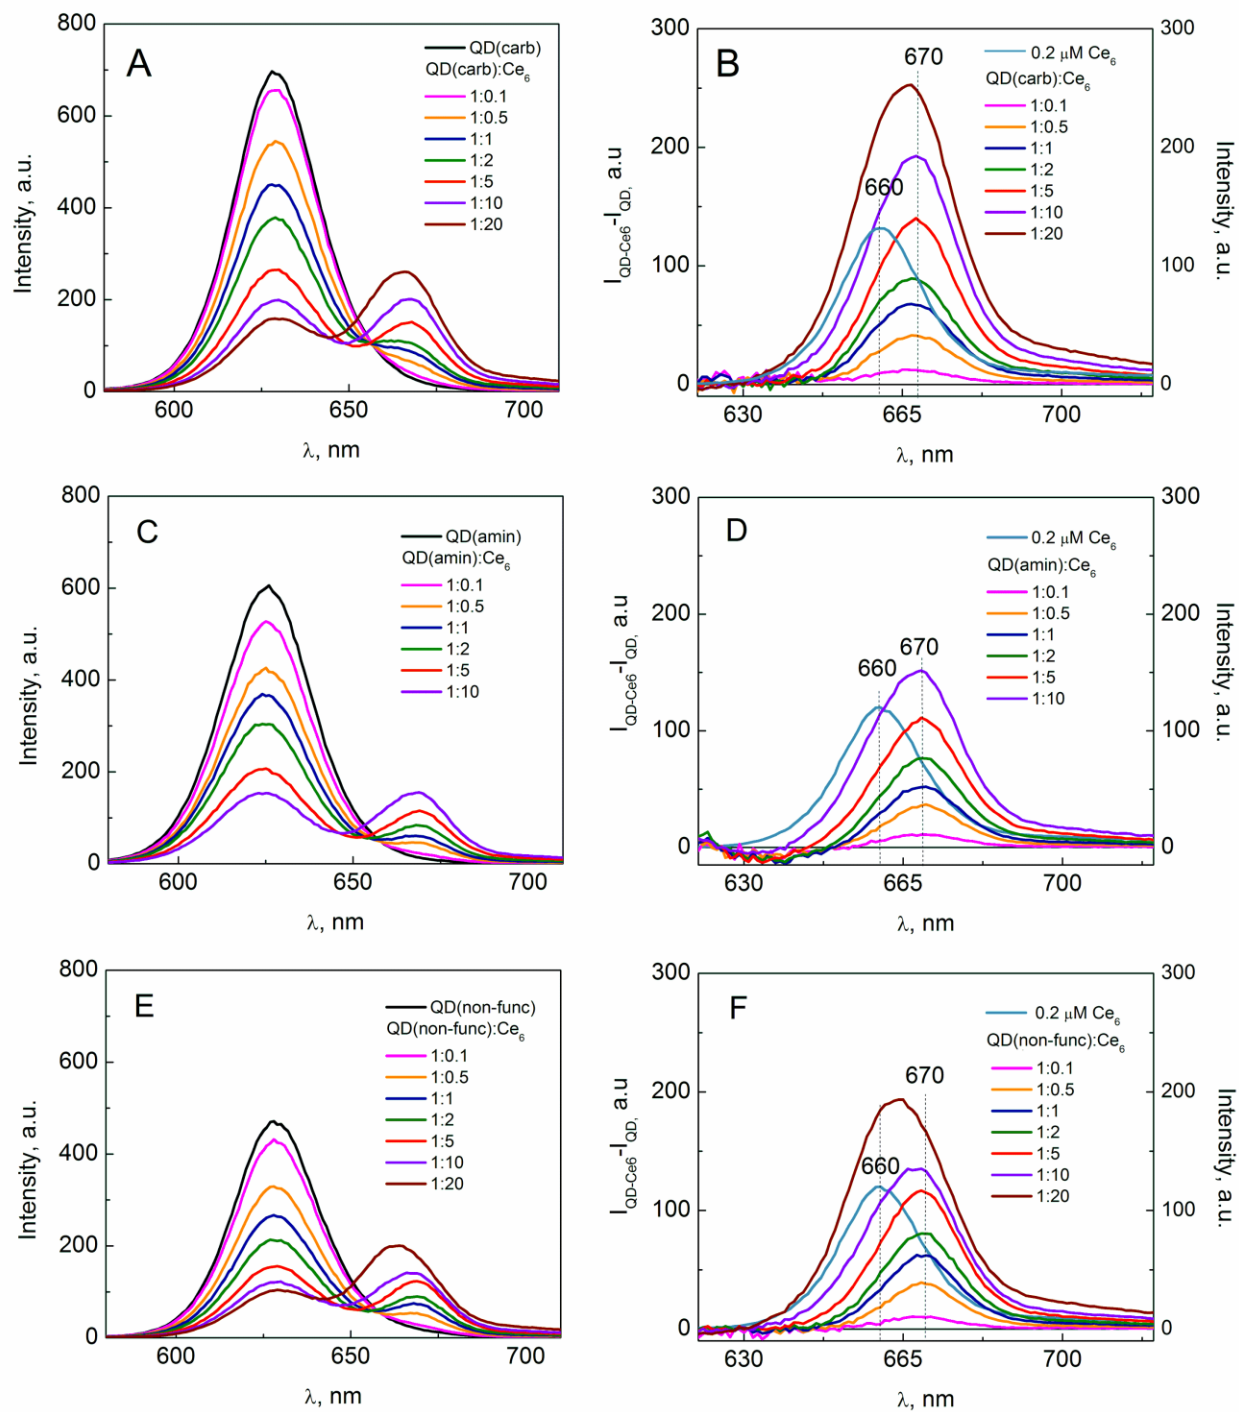

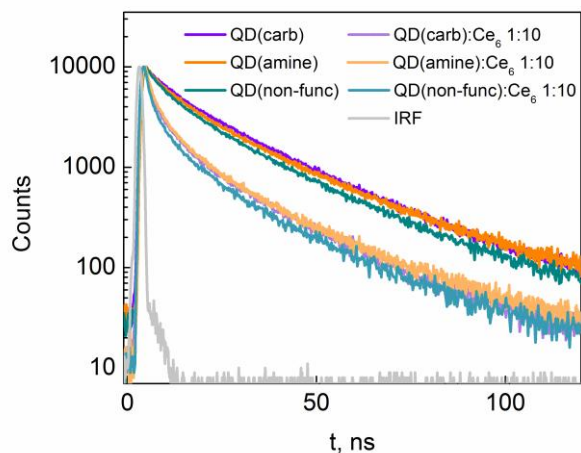

**Figure S5.** Fluorescence decay of 0.02  $\mu\text{M}$  QDs and QD- $\text{Ce}_6$  solutions at 1:10 QD: $\text{Ce}_6$  molar ratio registered at  $\lambda_{\text{em}}=620$  nm,  $\lambda_{\text{ex}}=405$  nm.

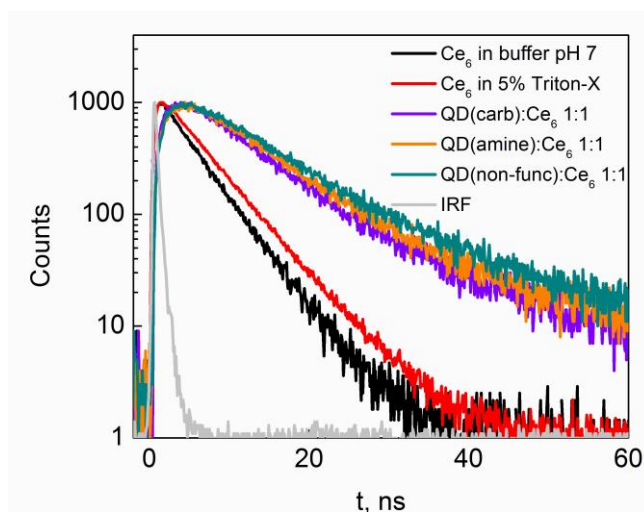

**Figure S6.** Fluorescence decay of 0.02  $\mu\text{M}$   $\text{Ce}_6$  in buffer, 5% Triton-X 100 and in QD- $\text{Ce}_6$  solutions (QD: $\text{Ce}_6$  molar ratio 1:1) registered at  $\lambda_{\text{em}}=670$  nm with  $\lambda_{\text{ex}}=470$  nm.
